# Supplementary material
Source: PubMed Central journal article supplement (PMC3233979)
Supplement: NIHMS323927-supplement-1.pdf [file NIHMS323927-supplement-1.pdf]

**a**

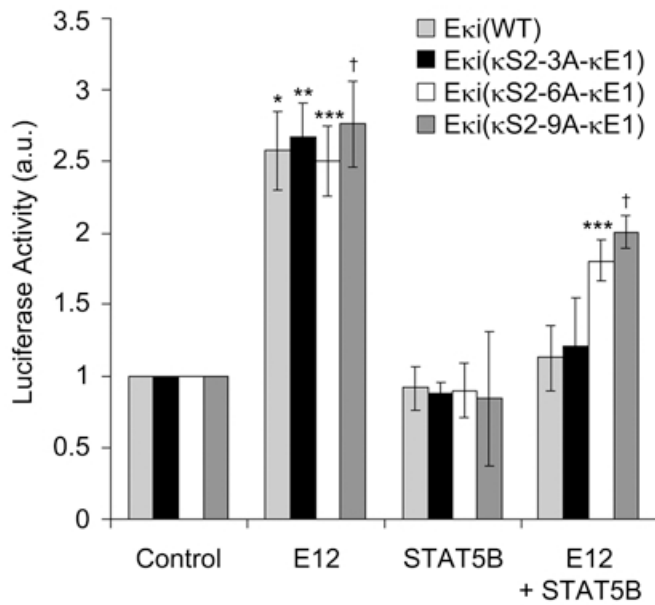

**b**

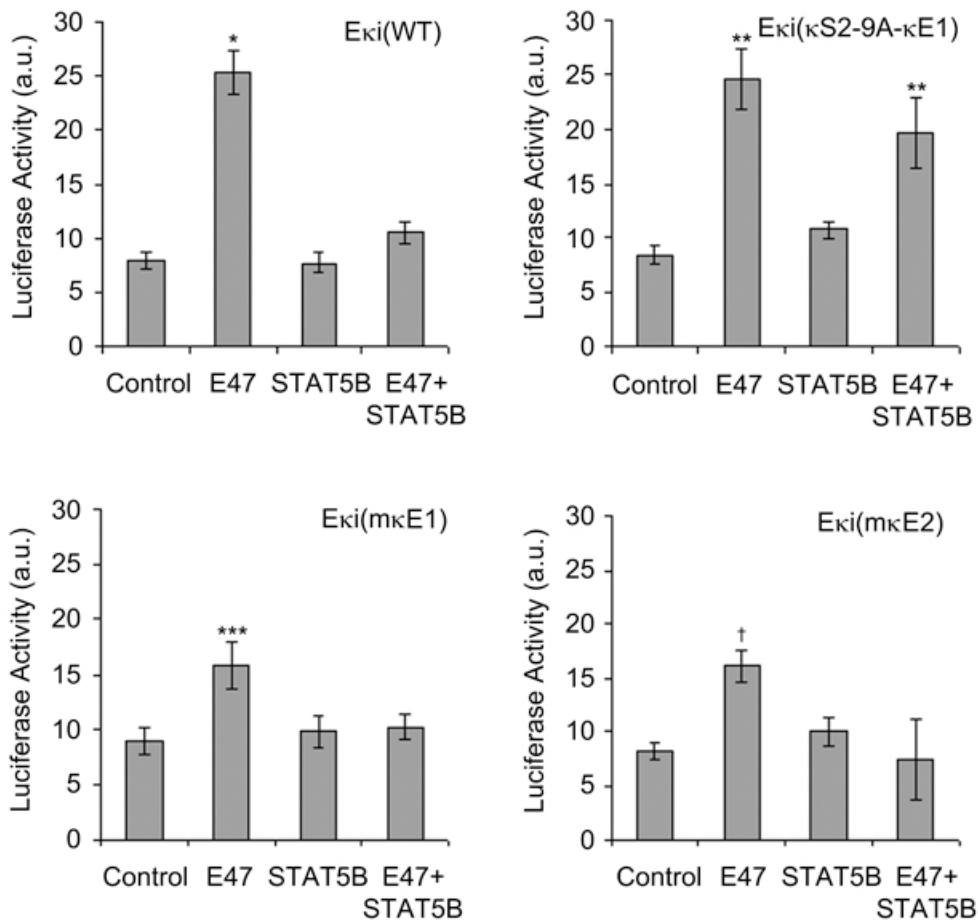







# Supplementray Table 1

Mandal *et. al.*

## List of probes and primers

| <b>EMSA: Biotinylated at 5' end and non biotinylated</b> |                                                                             |
|----------------------------------------------------------|-----------------------------------------------------------------------------|
| κS1(WT)-F                                                | 5'- TCT ATT GTT TTT CTT GGT AAA GAA CTC T-3'                                |
| κS1(WT)-R                                                | 5'-AGA GTT CTT TAC CAA GAA AAA CAA TAG A-3'                                 |
| κS1(Mut)-F                                               | 5'- TCT ATT GTT <u>TAA</u> GTT GGT AAA GAA CTC T-3'                         |
| κS1(Mut)-R                                               | 5'-AGA GTT CTT TAC CAA <u>CTT</u> AAA CAA TAG A-3'                          |
| κS2(WT)-F                                                | 5'-AGAGGGGACTTTCCGAGAGGCCATCTGGCAGTTGCTTAA -3'                              |
| κS2(WT)-R                                                | 5'-TTAAGCAACTGCCAGATG GCCTCTCGGAAAGTCCCCTCT-3'                              |
| κS2(Mut)-F                                               | 5'-AGAGGGGACT <u>AAG</u> CGAGAGGCCATCTGGCAGTTGCTTAA -3'                     |
| κS2(Mut)-R                                               | 5'-TTAAGCAACTGCCAGATG GCCTCTCG <u>CTT</u> AGTCCCCTCT-3'                     |
| κS2(CS)-F                                                | 5'-AGAGGGGACTTTCCGAGA <u>A</u> GCCATCTGGCAGTTGCTTAA -3'                     |
| κS2(CS)-R                                                | 5'-TTAAGCAACTGCCAGATGGC <u>TT</u> TCTCGGAAAGTCCCCTCT-3'                     |
| STAT5 dimer-only-F                                       | 5'-GAATGTAGT <u>TT</u> CAGGGAAGAAAGGCAA-3'                                  |
| STAT5 dimer-only-R                                       | 5'-TTGCCTTTCTTCCCTGAAACTACATTC-3'                                           |
| STAT5 tetramer-only-F                                    | 5'-CCGGGCT <u>TT</u> CAAAGAAGCATACTTTCCGGAGCA-3'                            |
| STAT5-tetramer-only-R                                    | 5'- TGCTCCGAAAGTATGCT <u>TT</u> CTTTGAAAGCCCGG-3'                           |
| STAT5-dimer-terramer-F                                   | 5'CCGGCT <u>TT</u> CGTGGAATCGTGGCACTATGAACCA-3'                             |
| STAT5-dimer-terramer-R                                   | 5'TGGT <u>TT</u> CATAGTGCCACGAT <u>TT</u> CCACGAAAGCCGG-3'                  |
| κS2-end-Mut-F                                            | 5'-AGAGGGGACTTTCCGAGAGGCCAA <u>AA</u> AGGCAGGGGCTTTT-3'                     |
| κS2-end-Mut-R                                            | 5'- <u>AA</u> AAGCC <u>CC</u> CTGCCT <u>TTT</u> TGGCCTCTCGGAAAGTC CCCTCT-3' |
| Pax5-F                                                   | 5'-TCGAAGGGCCACTGGAGCCATCTCCGGCACGGC-3'                                     |
| Pax5-R                                                   | 5'-TCGAGCCGTGCCGAGATGGGCTCCAGTGGCCCT-3'                                     |
| Oct-F                                                    | 5'-TCGGGTAATTTGCATTTCTAGCT-3'                                               |
| Oct-R                                                    | 5'-AGCTAGAAATGCAAATTACCCGA-3'                                               |
| <b>ChIP- Quantitative PCR</b>                            |                                                                             |
| Igκ-Eki - F                                              | 5'-TTTGACCCTTCCCTGCCAAA-3'                                                  |
| Igκ-Eki - R                                              | 5'-CAACTGTAATCTGGGCCACCTG-3'                                                |
| Vκ <sub>21-1</sub> -F                                    | 5'- TTGTGCTCACCAATCTCCAG-3'                                                 |
| Vκ <sub>21-1</sub> -R                                    | 5'- GGCTGTCTGGTTTCTGTTGG-3'                                                 |
| Jκ <sub>1</sub> . Jκ <sub>2</sub> -F                     | 5'-AGGCACCAAGCTGGAAATCAA-3'                                                 |
| Jκ <sub>1</sub> . Jκ <sub>2</sub> -R                     | 5'-TGCCTTGGAGAGTGCCAGAAT-3'                                                 |
| Jκ <sub>4</sub> . Jκ <sub>5</sub> - F                    | 5'- GCTCGGGGACAAAGTTGGAA-3'                                                 |
| Jκ <sub>4</sub> . Jκ <sub>5</sub> --R                    | 5'- GATGCACAGGTTGCCAGGAAT-3'                                                |
| Jκ <sub>5</sub> - Eki- F                                 | 5'- TGTTTTAATGGCCACGGTTTTG-3'                                               |
| Jκ <sub>5</sub> - Eki- R                                 | 5'- AGAAGAGGTTGCGGACCGTTT-3'                                                |
| Eki- F                                                   | 5'- GCAGGTGGCCAGATTACAGT-3'                                                 |
| Eki- R                                                   | 5'- AGGGCCTTAAGCCAGGGTCT-3'                                                 |
| Cκ-F                                                     | 5'- TCTGGAGGTGCCTCAGTCGT-3'                                                 |
| Cκ- R                                                    | 5'-CCAACTGTTACAGGACGCCATT-3'                                                |
| 3'Eκ- F                                                  | 5'- CCCACCTCCATCTTGTTTGA-3'                                                 |
| 3'Eκ- R                                                  | 5'- GGGCCAGTGACCATATCAGA-3'                                                 |
| Eki (pGL3-specific)-F                                    | 5'-GGTACCGAGCTCTTACGCGT-3'                                                  |
| Eki (pGL3-specific)-R                                    | 5'-GGACTATGGTTGCTGACTAATTGAGAT 3'                                           |
| Ezh2- F                                                  | 5'-AAACTTGCCACCTCGGAAAT-3'                                                  |
| Ezh2- R                                                  | 5'-CATTCAGGAGGCAGAGCACCT-3'                                                 |

| <b>ChIP- Quantitative PCR (Cont.)</b> |                                                                                                              |
|---------------------------------------|--------------------------------------------------------------------------------------------------------------|
| B-2 Microglobulin-F                   | 5'-AGACTGATACATACGCCTGCA-3'                                                                                  |
| B-2 Microglobulin-R                   | 5'-GCAGGTTCAAATGAATCTTCA-3'                                                                                  |
| Igk-Germline-F                        | 5'-GAGGGGGTTAAGCTTTTCGCCTACCCAC-3'                                                                           |
| Igk-Germline-R                        | 5'-GTTATGTCGTTTCATACTCGTCCTTGGTCAA-3'                                                                        |
| <b>Short Hairpin RNA Constructs</b>   |                                                                                                              |
| sh-Ezh2-390 (target seq)              | 5'-GGCACTTTCATTGAAGAACTAA-3'                                                                                 |
| sh-Ezh2-1562 (target seq)             | 5'-GTGCCCTTGTGTGATAGCACAA-3'                                                                                 |
| sh-Ezh2-390 (97mer)                   | 5'-TGCTGTTGACAGTGAGCGAGCACTTTCATTGAAGAACTAATAGTGAA<br>GCCACAGATGTATTAGTTCTTCAATGAAAGTGCCTGCCTACTGCCTCGGA-3'  |
| sh-Ezh2-1562 (97mer)                  | 5'-TGCTGTTGACAGTGAGCGATGCCCTTGTGTGATAGCACAAATAGTGAA<br>GCCACAGATGTATTGTGCTATCACACAAGGGCACTGCCTACTGCCTCGGA-3' |
| <b>Site directed mutagenesis</b>      |                                                                                                              |
| Mut κS1-F                             | 5'-CTGCTCATAATTCATTGT TTA <u>AG</u> TTGGTAAAGAAC-3'                                                          |
| Mut κS1-R                             | 5'-AAACAATAGAATTATGAGCAGCCTTTCCCCC-3'                                                                        |
| Mut κS2-F                             | 5'-GGCATCTCAACAGAGGGGACT <u>AA</u> GCGAGAGGCCATC-3'                                                          |
| Mut κS2-R                             | 5'-AGTCCCCTCTGTTGAGATGCCAACTCTTGGGT-3'                                                                       |
| κS2-3A spacer-F                       | 5'-CAGAGGGGACTTTCCGAGAGG <u>AAA</u> CCATCTGGCAG-3'                                                           |
| κS2-6A spacer-F                       | 5'-CAGAGGGGACTTTCCGAGAGG <u>AAAAAA</u> CCATCTGGCAG-3'                                                        |
| κS2-9A spacer-F                       | 5'-CAGAGGGGACTTTCCGAGAGG <u>AAAAAAAA</u> CCATCTGGCAG-3'                                                      |
| κS2- 3A/6A/9A spacer-R                | 5'-CCTCTCGGAAAGTCCCCTCTGTTGAGATGCCAAC-3'                                                                     |
| Mut κE1-F                             | 5'-AGAGGGGACTTTCCGAGAGGC <u>AAA</u> CTGGCAGTTGCT-3'                                                          |
| Mut κE1-R                             | 5'-GCCTCTCGGAAAGTCCCCTCTGTTGAGATGCC-3'                                                                       |
| Mut κE2-F                             | 5'-AGTCTGCCAGTTCCTCCAGG <u>AAA</u> GTGGCCAGATT-3'                                                            |
| Mut κE2-R                             | 5'-CCTGGGAGGAAGTGGCAGACTTCACTTCTGAT-3'                                                                       |

# Supplementary Table 2

Mandal *et. al.*

List of genes where both STAT5 and H3K27me3 bind at the regulatory sites

| <u>Chromosome no</u> | <u>Gene name</u> | <u>STAT5 binds at</u>             | <u>H3K27 trimethylation Status</u>                |
|----------------------|------------------|-----------------------------------|---------------------------------------------------|
| Chr2                 | Cstad            | Intron 1                          | High in promoter and entire gene                  |
| Chr2                 | Lhx6             | 370bp upstream<br>4kb upstream    | High in promoter and entire gene                  |
| Chr2                 | Hoxd3            | Intron 1                          | High in promoter and entire gene                  |
| Chr2                 | Pax6             | ~20kb upstream<br>~9kb upstream   | High in promoter and entire gene                  |
| Chr2                 | Cdh22            | Intron 1                          | High in promoter and entire gene                  |
| Chr2                 | Matn4            | 1.1kb upstream (Rev strand)       | High in promoter and entire gene                  |
| Chr2                 | Mir10b           | Intron 1                          | High throughout the entire gene                   |
| Chr3                 | Mir9-1           | ~20kb upstream<br>~4.5kb upstream | High throughout the entire gene                   |
| Chr3                 | Adar             | ~14kb upstream                    | High in promoter and extended to intron 1         |
| Chr4                 | Arhgef19         | ~3.576kb upstream                 | High throughout the entire region                 |
| Chr5                 | Flt1             | Intron 1                          | High in promoter and upto 1st Exon and 1st Intron |
| Chr5                 | Tbx3             | ~3kb downstream                   | High in promoter and entire gene                  |
| Chr5                 | Tbx5             | ~29kb upstream                    | High in promoter and entire gene                  |
| Chr5                 | Grid2ip          | ~3.212kb upstream                 | High in promoter and entire gene                  |
| Chr6                 | Wnt16            | Intron 3                          | High in promoter and low in entire gene           |
| Chr6                 | Igk-Eki          | Intronic kappa Enhancer           | High in the entire intronic kappa enhancer        |
| Chr6                 | Atoh8            | Intron 2 (Rev strand)             | High in promoter and entire gene                  |
| Chr6                 | Rimklb           | Intron 1 (Rev strand)             | High in promoter and the beginning of the gene    |
| Chr7                 | Homer 2          | ~3.5kb up                         | High in promoter and the beginning of the gene    |
| Chr7                 | Nav2             | ~4kb up                           | High in promoter and upto 1st Exon                |
| Chr7                 | Fgf15            | Intron 2                          | High in promoter and entire gene                  |
| Chr7                 | Mir7-2           |                                   | High throughout the entire gene                   |
| Chr8                 | Vat1l            | 330bp upstream                    | High in promoter and entire gene                  |
| Chr8                 | Ncan             | Intron 7                          | High in promoter and entire gene                  |
| Chr9                 | Igdcc3           | Intron 2                          | High in promoter and entire gene                  |
| Chr9                 | Elov14           | ~322bp upstream (Rev)             | High in promoter and beginning of gene            |
| Chr9                 | Amotl2           | ~25kb upstream                    | High in promoter and beginning of the gene        |
| ChrX                 | Nhs              | Intron 1 of 7                     | Low in promoter and beginning of the gene         |
| Chr10                | Rspo3            | ~3kb upstream                     | High in promoter and beginning of the gene        |
| Chr11                | SLC47a1          | Intron 14 (Rev)                   | High in promoter and entire gene                  |
| Chr11                | SLC47a2          | ~9kb upstream (Rev)               | High in promoter and beginning of the gene        |
| Chr11                | Osbp2            | Intron 2 of 13 (Rev)              | High in promoter and entire gene                  |
| Chr12                | Fam150b          | Intron 3 of 4                     | High in promoter and entire gene                  |
| Chr12                | Zdhhc22          | ~3kb upstream                     | High in promoter and entire gene                  |
| Chr12                | Eml1             | ~224bp upstream                   | High throughout the entire region                 |
| Chr14                | Grid1            | Intron 2 of 15                    | High in promoter and beginning of the gene        |
| Chr14                | Jph4             | Intron 1 of 1 (Rev)               | High in promoter and entire gene                  |
| Chr14                | Htr2a            | Exon 1 of 3                       | High in promoter                                  |
| Chr16                | Brwd1            | ~5.8kb upstream                   | High in promoter and beginning of the gene        |
| Chr17                | Sox8             | Intronic                          | High throughout the entire region                 |
| Chr17                | Mir715           | Transcription strat site          | High throughout the entire region                 |
| Chr18                | Arap3            | ~24.5kb upstream (Rev)            | High in promoter                                  |
| Chr19                | Pax2             | ~93kb upstream                    | High in promoter and entire gene                  |
| chr19                | Dmrt2            | Intron 2                          | High throughout the entire region                 |

# Supplementary Table 3

Mandal *et. al.*

| <u>Predicted STAT5 tetrameric binding motifs</u> | <u>Number of nucleotides between two motifs</u> | <u>First motif</u> | <u>Second motif</u> |
|--------------------------------------------------|-------------------------------------------------|--------------------|---------------------|
| TTTCCTTCCCTTGAAGGTGTGGAGAAT                      | 7                                               | TTTCCTTCCCT        | GTGTGGAGAAT         |
| CTTCCCTTGAAGGTGTGGAGAAT                          | 3                                               | CTTCCCTTGA         | GTGTGGAGAAT         |
| TTTCTGGTTTTTTCTTTCCCTCCCTT                       | 5                                               | TTTCTGGTTTT        | TTTCCTCCCTT         |
| TTTCTTTCCCTCCCTTCCCTCTGGT                        | 3                                               | TTTCTTTCCCTC       | CTTCCTCTGGT         |
| TTTCCTCCCTTCCCTCTGGTATTTCTTTCCAG                 | 10                                              | TTTCCTCCCTT        | TTTCTTTCCAG         |
| CTTCCTCTGGTATTTCTTTCCAG                          | 3                                               | CTTCCTCTGGT        | TTTCTTTCCAG         |
| CTTCCTCTGGTATTTCTTTCCAGCCAA                      | 7                                               | CTTCCTCTGGT        | TTTCCAGCCAA         |
| TTTCCAGCCAAGATCTTGTTAGGTA                        | 5                                               | TTTCCAGCCAA        | CTTGTTAGGTA         |
| CTTGTTAGGTACCAAATATTCACCCGCA                     | 8                                               | CTTGTTAGGTA        | ATTCACCCGCA         |
| GTTCTTTAGATCTCAAAGTATACGGAAA                     | 8                                               | GTTCTTTAGAT        | GTATACGGAAA         |
| ATTCCACATGAAGCCACGTTCTGTTGAT                     | 8                                               | ATTCCACATGA        | GTTCTGTTGAT         |
| TCCACATGAAGCCACGTTCTGTTGAT                       | 7                                               | TCCACATGAA         | GTTCTGTTGAT         |
| CTTCCCGAAATTTCATAATC                             | 3                                               | CTTCCCGAAA         | TTTCAATAATC         |
| GTTCCGTGTCTCCGTTCACTTACT                         | 4                                               | GTTCCGTGTCT        | GTTCACTTACT         |
| GTTCCCTTTGCCTTGTCCACAGAAC                        | 6                                               | GTTCCCTTTGC        | GTCCACAGAAC         |
| CTTCATTCAAGAACTTCTGTCCAT                         | 4                                               | CTTCATTCAAG        | CTTCTGTCCAT         |
| TTTCCCAAGTCCTTCCTCCCCAGAA                        | 5                                               | TTTCCCAAGTC        | CTTCCCCAGAA         |
| CTTCAGCTCACTCAGCTTCAGGGGTG                       | 6                                               | CTTCAGCTCAC        | CTTCAGGGGTG         |
| TTTCCCACAGACACCTTCTCCCTAT or                     | 7                                               | TTTCCCACA          | CTTCTCCCTAT         |
| CTTGTCTGGGGTGAGTTCCACAGCC                        | 6                                               | CTTGTCTGGGG        | TTTCCACAGCC         |
| ATTCATCATAGGAGTACAGCTGACATAGCAATGGAAG            | 17                                              | ATTCATCATAG        | TAGCAATGGAAG        |
| CTTCACCTGGCTCTGATCCAGAAC                         | 4                                               | CTTCACCTGGC        | TGATCCAGAAC         |
| GTTGGCCCGGTGCCCGCGCTCTCCGAGG                     | 8                                               | GTTGGCCCGGT        | GCTCTCCGAGG         |
| ATTCTCCCATTTCCCTCCCTTCCCT                        | 5                                               | ATTCTCCCAT         | CTTCCCTTCCCT        |
| TTTCCTTCCCTTCCCTTCCCTTCCCTTCCCT                  | 7                                               | TTTCCTTCCCT        | CGGTCTGGAAC         |
| CTTCCCTTCCCTTCCCTTCCCTTCCCTTCCCT                 | 3                                               | CTTCCCTTCCCT       | CGGTCTGGAAC         |
| GTTCCCCAGGAGTGGCCTAATATTGTCTAGAT                 | 13                                              | GTTCCCCAGG         | ATTGTCTAGAT         |
| CTTCCGTTCTCCCAGGACAGGAAG                         | 5                                               | CTTCCGTTCTC        | AGGACAGGAAG         |



| <u>Predicted STAT5 tetrameric binding motifs</u> | <b>Number of nucleotides between two motifs</b> | <u>First motif</u> | <u>Second motif</u> |
|--------------------------------------------------|-------------------------------------------------|--------------------|---------------------|
| TTTCCCCCACCTTTCCCTGCTC                           | 3                                               | TTTCCCCCAC         | TTTCCCTGCTC         |
| TTTCCCTGCTCCCTGCTTTCCACAGT                       | 7                                               | TTTCCCTGCTC        | TTTCCACAGT          |
| GTTCTCCCCAGGACAGGAAGTACAAGAGAAA                  | 11                                              | GTTCTCCCCAG        | TACAAGAGAAA         |
| GTTCAGATCAGAGGTCTGTTCCAAGGTT                     | 8                                               | GTTCAGATCAG        | GTTCCAAGGTT         |
| GTTCCAAGGTTCAATAAAGAAC                           | 3                                               | GTTCCAAGGTT        | CAGTAAAAGAAC        |
| TTTCCATTTCAATTTGAACATGCAATTCAAACAGG              | 14                                              | TTTCCATTTCA        | ATTCAAACAGG         |
| TTTCATTTGAACATGCAATTCAAACAGG                     | 8                                               | TTTCATTTGAA        | ATTCAAACAGG         |
| C TTCATGTAGGAAC TTCAGAAGTG                       | 4                                               | C TTCATGTAGG       | C TTCAGAAGTG        |
| C TTCAGAAGTGGACTTTCTGTTGCT                       | 5                                               | C TTCAGAAGTG       | TTTCTGTTGCT         |
| C TTCCTGGAAGCTGGGGTCAGTCAGGGTAAC                 | 10                                              | C TTCCTGGAAGC      | GTCAGGGTAAC         |
| G GACTCAGAACATTTGTCATTCTGTGCGG                   | 9                                               | G GACTCAGAAC       | ATTCTGTGCGG         |
| C TTGGGCTGAGGATTCTGCGTCC                         | 3                                               | C TTGGGCTGAG       | ATTCTGCGTCC         |
| TTTCAGACACTGCTCTTGCTCTCAAT                       | 5                                               | TTTCAGACACT        | CTTGTCTCAAT         |
| G TTCACATAACCCCTAAAAATCGGTAGTCATGAAG             | 15                                              | G TTCACATAAC       | G TAGTCATGAAG       |
| G TTCAAAGAAAGCCTTCAGCCCTA                        | 3                                               | G TTCAAAGAAAG      | C TTCAGCCCTA        |
| C TTGGTAGAAATAAACTTCTGAGCAA                      | 6                                               | C TTGGTAGAAA       | C TTCTGAGCAA        |
| C TTCCCGCACCTCCCTGCCGCTCCACTCAGAAC               | 13                                              | C TTCCCGCACC       | C CACTCAGAAC        |
| A TTCGTCTCTGTCCATTTCAAGGCGC                      | 6                                               | A TTCGTCTCTG       | T TTCAAGGCGC        |
| G TTCGAGTCAACCCTTTCTCCTCAG                       | 4                                               | G TTCGAGTCAAC      | T TTCCTCCTCAG       |
| C TTCCTCCCCAGGGGTCCTGGCAGG                       | 4                                               | C TTCCTCCCCAG      | G TCCTGGCAGG        |
| A TTC CAGGAGTTATCTGCCTACCTCTGCCCAAG              | 13                                              | A TTC CAGGAGT      | C TCTGCCCAAG        |
| G TTCCTGCCGGATGCAACGTGGGAAA                      | 5                                               | G TTCCTGCCGGA      | A ACGTGGGAAA        |
| T TTCCTGGTTCTTGCCTATCATTACCTCCA                  | 10                                              | T TTCCTGGTTCT      | A TTCACCTCCA        |
| G TTCCTTGCCTATCATTCACCTCCATCACAT                 | 5                                               | G TTCCTTGCCTA      | A TTCACCTCCA        |
| T TTCACTGTAAAGGAATGCCATTTGTCTTAAG                | 12                                              | T TTCACTGTAA       | T TTCGTCTTAAG       |
| T GTAAAGGAATGCCATTTGTCTTAAG                      | 6                                               | T GTAAAGGAAT       | T TTCGTCTTAAG       |
| C TTC CGCTGCTGAGACTGGGGATTTGTAAAAC               | 12                                              | C TTC CGCTGCT      | A TTTGTAAAAC        |
| C TTCCTAGCAGAAGCATTAGATTGCTAAACT                 | 10                                              | C TTCCTAGCAGA      | A TTGCTAAACT        |
| G TACAGGGAAATGCCCTAAGATGCTGTTGAAG                | 13                                              | G TACAGGGAAA       | T GCTGTTGAAG        |
| C TTC CCCATAGCATCTCAGCTGAAC                      | 5                                               | C TTC CCCATAG      | C TCAGCTGAAC        |
| A TTCAGAAAATGCTCTGTTCCGCGATT                     | 7                                               | A TTCAGAAAAT       | G TTCGCGCGATT       |
| C TTC CGGCAATGAGGCTTACCGGACAAT                   | 6                                               | C TTC CGGCAAT      | C TTCACGGACA        |

| <u>Predicted STAT5 tetrameric binding motifs</u> | <b>Number of nucleotides between two motifs</b> | <u>First motif</u> | <u>Second motif</u> |
|--------------------------------------------------|-------------------------------------------------|--------------------|---------------------|
| ATTCAGGAATTTGAGGCTCCCCTGAGA                      | 9                                               | ATTCAGGAAT         | CTCCCCTGAGA         |
| CTTCCATTACATCCTCATTTGTTTATGAAC                   | 11                                              | CTTCCATTAC         | TGTTTATGAAC         |
| TTCAAAGGAAGGGTGTCTTGAGAAG                        | 6                                               | TTCAAAGGA          | GTCCTTGAGAAG        |
| ATTCACATCCTCATTTGTTTATGAAC                       | 6                                               | ATTCACATCCT        | TGTTTATGAAC         |
| ATTCTATTCAGCTGAACATCACACAAG                      | 7                                               | ATTCTATTCAG        | CATCACACAAG         |
| CTTCTCCGGCACCCGTCCTTTTTCATGC                     | 7                                               | CTTCTCCGGCA        | CTTCTTTTCAT         |
| CTCCGGCACCCGTCCTTTTTCATGC                        | 4                                               | CTCCGGCACCC        | CTTCTTTTCAT         |
| GTTGATTAACGAGCAATCCTTTGAAG                       | 8                                               | GTTGATTAAC         | ATCCTTTGAAG         |
| ATTAACGAGCAATCCTTTGAAG                           | 4                                               | ATTAACGAG          | ATCCTTTGAAG         |
| ATTCCTAAGCTGACATTCTCTGCCT                        | 5                                               | ATTCCTAAGCT        | ATTCTCTGCCT         |
| TTTCTGCATCCTTGGTCCCCTCTTGGGGTAGG                 | 12                                              | TTTCTGCATCG        | CTTGGGGTAGG         |
| ATCCTTGGTCCCCTCTTGGGGTAGG                        | 5                                               | ATCCTTGGTCC        | CTTGGGGTAGG         |
| CTTGGGGTAGGGACATGGGTTCTTGTGGA                    | 9                                               | CTTGGGGTAGG        | GTTCTTGTGGA         |
| CTTCTTATGTGGCCCATCCACAAT                         | 6                                               | CTTCTTATGTG        | CATCCACAAT          |
| GTTCTGGTGACTTTCTTCATGGTGT                        | 5                                               | GTTCTGGTGAC        | CTTCATGGTGT         |
| CGTCTGGAAGCCGTCCTCCAGAGCC                        | 7                                               | CGTCTGGAAG         | CTTCCAGAGCC         |
| TTTCCTGATGTCACCTGCCATAGC                         | 4                                               | TTTCCTGATGT        | CTTGCCATAGC         |
| CTTCTTAGTCCATTAGGTCCTCAGCTG                      | 8                                               | CTTCTTAGTCC        | GTCCTCAGCTG         |
| TTCCACATTTAATCTCACCCCTCGGACT                     | 8                                               | TTCCACATTT         | ACCCTCGGACT         |
| CTTTATTGACAACCTGTCGTGATT                         | 3                                               | CTTTATTGACA        | CTGTCGTGATT         |
| ATTATTCTACCATTTGCGGGAAA                          | 3                                               | ATTATTCTAC         | ATTGCGGGAAA         |
| TTTCCTGATGTCACCTGCCATAGC                         | 4                                               | TTTCCTGATGT        | CTTGCCATAGC         |
| TTTCCTTGTCATGCCCGTGTCCATGTTAA                    | 9                                               | TTTCCTTGTC         | GTCCATGTTAA         |
| ATCAAGGACAGATAATATGTCATGCATG                     | 10                                              | ATCAAGGACA         | ATGCATGCATG         |
| TTCCATGGTTATGTTCTTCCTTAAGG                       | 7                                               | TTCCATGGTT         | CTTCCTTAAGG         |
| GTTCCGGAGGGAAAGCCGTGGCCTTCGATGCAG                | 13                                              | GTTCCGGAGGG        | CTTCGATGCAG         |
| ATCAAAAAGCATTGAGAGGCAAAGGAAT                     | 9                                               | ATCAAAAAGC         | GGCAAAGGAAT         |

# Supplementary Table 4

Mandal *et. al.*

Analysis of STAT5 tetrameric binding motifs (total no of motifs 88)

| Position (First Site)                                              | No. of As/<br>%                                                                                                                               | No. of Ts/% | No. of Gs/% | No. of Cs/% |
|--------------------------------------------------------------------|-----------------------------------------------------------------------------------------------------------------------------------------------|-------------|-------------|-------------|
| 1                                                                  | 0/0                                                                                                                                           | 85/97       | 3/3         | 0/0         |
| 2                                                                  | 2/2                                                                                                                                           | 83/95       | 0/0         | 3/3         |
| 3                                                                  | 2/2                                                                                                                                           | 3/3         | 8/9         | 75/86       |
| 4                                                                  | 23/26                                                                                                                                         | 21/24       | 7/8         | 37/42       |
| 5                                                                  | 18/20                                                                                                                                         | 28/32       | 20/23       | 22/25       |
| 6                                                                  | 19/21                                                                                                                                         | 21/24       | 22/25       | 26/30       |
| 7                                                                  | 18/20                                                                                                                                         | 23/27       | 27/31       | 20/22       |
| 8                                                                  | 24/28                                                                                                                                         | 17/19       | 24/27       | 23/26       |
| 9                                                                  | 41/47                                                                                                                                         | 14/16       | 13/15       | 20/22       |
| No. of bases in between two sites (number appeared/<br>% appeared) | 3(12/14%); 4(10/11%); 5(14/16%); 6(11/13%); 7(9/10%); 8(9/10%); 9(5/6%); 10(5/6%); 11(2/2%); 12(3/3%); 13(5/6%); 14(1/1%); 15(1/1%); 17(1/1%) |             |             |             |
| Position (Second Site)                                             | No. of As/%                                                                                                                                   | No. of Ts/% | No. of Gs/% | No. of Cs/% |
| 1                                                                  | 5/6                                                                                                                                           | 70/80       | 10/11       | 3/3         |
| 2                                                                  | 3/3                                                                                                                                           | 59/68       | 8/9         | 18/20       |
| 3                                                                  | 8/9                                                                                                                                           | 13/14       | 12/14       | 55/63       |
| 4                                                                  | 21/24                                                                                                                                         | 32/36       | 11/13       | 24/27       |
| 5                                                                  | 16/18                                                                                                                                         | 21/24       | 20/23       | 31/35       |
| 6                                                                  | 21/24                                                                                                                                         | 29/33       | 23/26       | 15/17       |
| 7                                                                  | 11/13                                                                                                                                         | 20/23       | 40/45       | 17/19       |
| 8                                                                  | 48/55                                                                                                                                         | 4/5         | 16/18       | 20/22       |
| 9                                                                  | 45/51                                                                                                                                         | 14/16       | 16/18       | 13/15       |

# Supplementary Table 5

Mandal *et. al.*

| Sample   | Reads    | Fails to align | Aligned reads | Duplicate reads | Unique mapped reads |
|----------|----------|----------------|---------------|-----------------|---------------------|
| Input    | 30669275 | 920362         | 21329219      |                 |                     |
| H3K27me3 | 28968570 | 991113         | 19459871      | 1407177         | 18052694            |
| STAT5    | 26487197 | 2414068        | 17282363      | 1518430         | 15763933            |
